# Supplementary material
Source: publisher site journal article supplement (https://www.dovepress.com/article/533552)
Supplement: Supplementary file 1 [file 533552%20Supplementary%20materials_1.docx]

**Supplementary materials**

**Supplementary Figure 1**

**
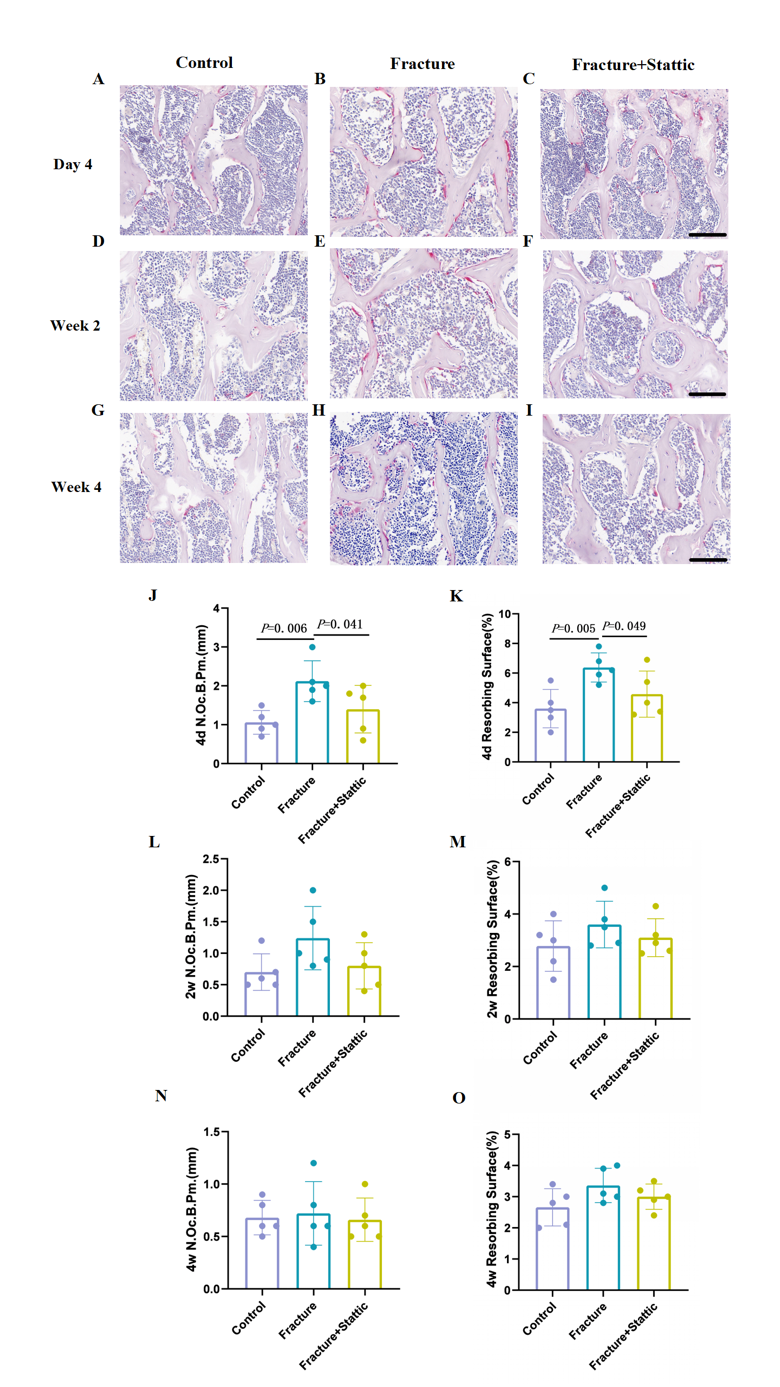
**

**Stattic can also attenuate increased osteoclast activity after fracture.**

(A-I) Representative TRAP staining images of trabecular bone in the L5 vertebral body from fractured mice treated with Stattic or saline, and control mice at (A-C) 4 days, (D-F) 2 weeks, and (G-I) 4 weeks post-fracture. Scale bar = 250 µm. (J-K) Quantitative analysis of osteoclast number (N.Oc/B.Pm) and the percentage of resorbing surface at 4 days after fracture (n = 5 mice/group). (L-O) Quantitative analysis of osteoclast number (N.Oc/B.Pm) and the percentage of resorbing surface at 2 and 4 weeks after fracture. (n = 5 mice/group). Error bars represent SDs. p-values were calculated using one-way ANOVA followed by Tukey’s post hoc test.

**Supplementary Figure 2**

**
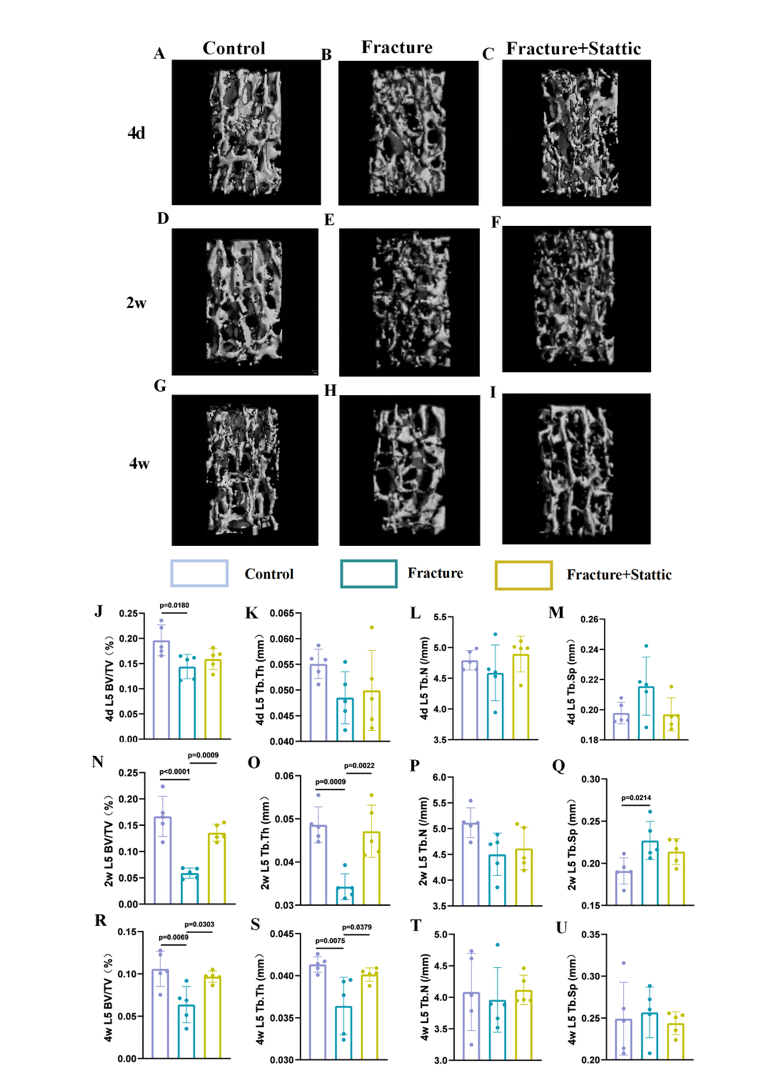
**

**Stattic can alleviate cancellous bone loss in the L5 vertebra after femur fracture.**

(A-I) Representative µCT images depicting L5 cancellous bone morphology and (J–U) quantitative µCT analysis of BV/TV, Tb.Th, Tb.N, and Tb.Sp in control mice, fractured mice, and fractured mice treated with Stattic at 4 days, 2 weeks, and 4 weeks post-fracture (n = 5 mice/group). Error bars indicate standard deviations (SDs). p-values were calculated using one-way ANOVA followed by Tukey’s post hoc test. Abbreviations: BV/TV, bone volume/tissue volume; Tb.Th, trabecular thickness; Tb.N, trabecular number; Tb.Sp, trabecular separation.

**Supplementary Figure 3**

**
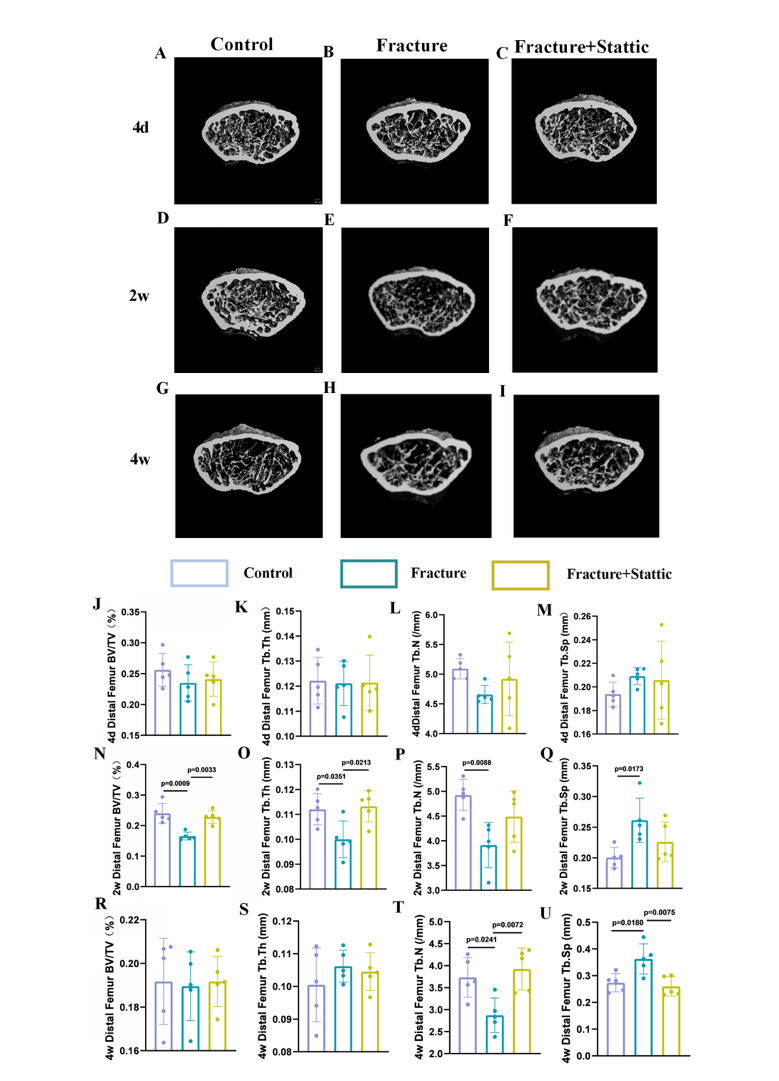
**

**Stattic can rescue bone loss in the contralateral distal femur metaphasis after femur fracture.**

(A-I) Representative µCT images illustrating the trabecular architecture of the distal femur diaphysis, along with (J-U) quantitative µCT assessments of BV/TV, Tb.Th, Tb.N, and Tb.Sp in control mice, fractured mice, and fractured mice treated with Stattic at 4 days, 2 weeks, and 4 weeks post-fracture (n = 5 mice/group). Error bars represent standard deviations (SDs). p-values were calculated using one-way ANOVA followed by Tukey’s post hoc test. Abbreviations: BV/TV, bone volume/tissue volume; Tb.Th, trabecular thickness; Tb.N, trabecular number; Tb.Sp, trabecular separation.

**Supplementary Figure 4**

**
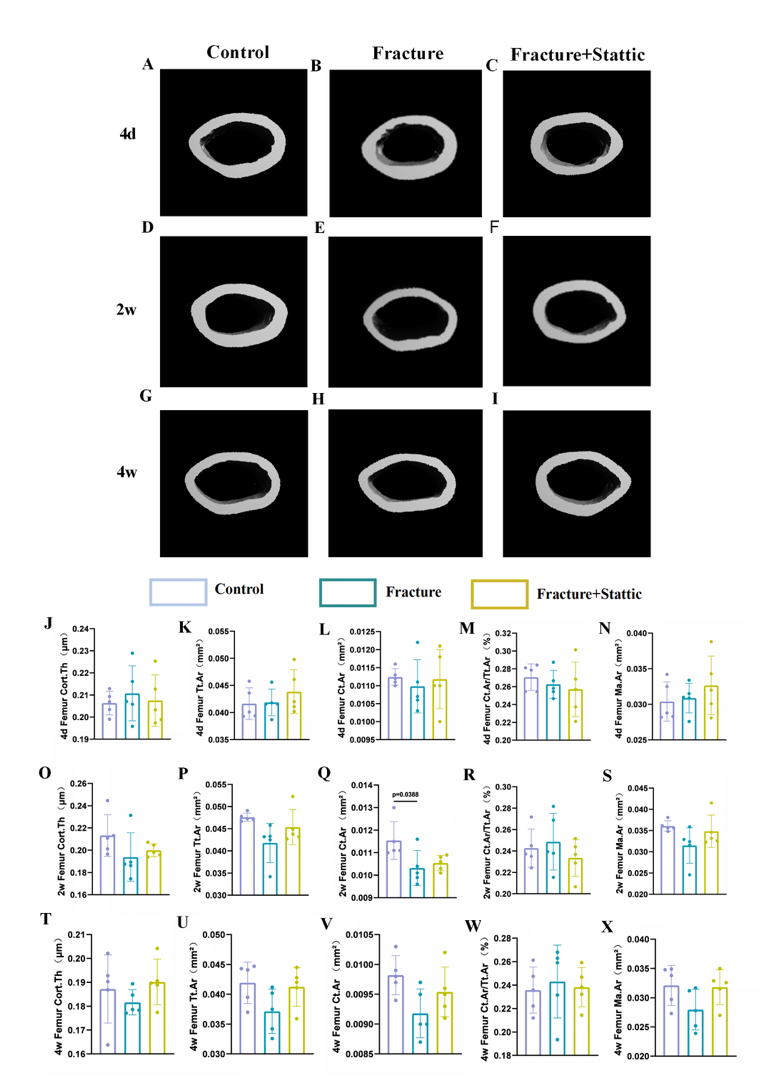
**

**Cortical bone is not affected after femur fracture, and Stattic does not induce any further changes.**

(A-I) Representative µCT images depicting cortical bone morphology, along with (J-X) quantitative µCT analyses of Cort.Th, Tt.Ar, Ct.Ar, Ct.Ar/Tt.Ar, and Ma.Ar in control mice, fractured mice, and fractured mice treated with Stattic at 4 days, 2 weeks, and 4 weeks post-fracture (n = 5 mice/group). Error bars indicate standard deviations (SDs). Statistical comparisons were performed using one-way ANOVA followed by Tukey’s post hoc test. Abbreviations: Ct.Ar, cortical area; Tt.Ar, total cross-sectional area; Ma.Ar, medullary area; Cort.Th, cortical thickness; Ct.Ar/Tt.Ar = cortical area/total cross-sectional area.
